# Supplementary material for: Expansion of gene clusters, circular orders, and the shortest Hamiltonian path problem
Source: PubMed Central journal article supplement (PMC6060901; doi:10.1007/s00285-017-1197-3), 2017-12-19
Supplement: 285_2017_1197_MOESM1_ESM.pdf [file 285_2017_1197_MOESM1_ESM.pdf]

# Expansion of Gene Clusters, Circular Orders, and the Shortest Hamiltonian Path Problem SUPPLEMENTAL MATERIAL

Sonja J. Prohaska · Sarah J. Berkemer ·  
Fabian Gärtner · Thomas Gatter ·  
Nancy Retzlaff · The Students of the  
Graphs and Biological Networks Lab  
2017 · Christian Höner zu Siederdisen ·  
Peter F. Stadler

the date of receipt and acceptance should be inserted later

Additional machine readable data, including alignments of all sequences used to compute genetic distances, are compiled for download at <http://www.bioinf.uni-leipzig.de/publications/supplements/17-012>.

---

S.J. Prohaska

Computational EvoDevo Group, Department of Computer Science & Interdisciplinary Center for Bioinformatics, Universität Leipzig, Härtelstraße 16-18, D-04107 Leipzig, Germany.  
E-mail: [sonja@bioinf.uni-leipzig.de](mailto:sonja@bioinf.uni-leipzig.de)

Sarah J. Berkemer and Nancy Retzlaff

Max Planck Institute for Mathematics in the Sciences, Inselstraße 22, D-04103 Leipzig, Germany

Fabian Gärtner

Competence Center for Scalable Data Services and Solutions Dresden/Leipzig and Bioinformatics Group, Department of Computer Science, Universität Leipzig, Härtelstraße 16-18, D-04107 Leipzig, Germany

C. Höner zu Siederdisen and Thomas Gatter

Bioinformatics Group, Department of Computer Science & Interdisciplinary Center for Bioinformatics, Universität Leipzig, Härtelstraße 16-18, D-04107 Leipzig, Germany;

P.F. Stadler

Bioinformatics Group, Department of Computer Science & Interdisciplinary Center for Bioinformatics, Universität Leipzig, Härtelstraße 16-18, D-04107 Leipzig, Germany; Max Planck Institute for Mathematics in the Sciences, Inselstraße 22, D-04103 Leipzig, Germany; RNomics Group, Fraunhofer Institute for Cell Therapy and Immunology, D-04103 Leipzig, Germany; Institute for Theoretical Chemistry, University of Vienna, Währingerstrasse 17, A-1090 Wien, Austria; Santa Fe Insitute, 1399 Hyde Park Rd., Santa Fe NM 87501, USA.  
E-mail: [studla@bioinf.uni-leipzig.de](mailto:studla@bioinf.uni-leipzig.de)

**Table 1** Overview of the sequence data in the Hox gene cluster of *Branchiostoma lanceolatum*. The Hox11 gene is only partially available and has been replaced here with the Hox11 gene of the closely related *Branchiostoma lanceolatum* Hox11 sequence, to which the available fragment is identical. Only the homodomains were used.

| Full Name | Abbreviation | Accession  | Database | URL   |
|-----------|--------------|------------|----------|-------|
| Hox1      | Hox1         | ACJ74382.1 | GenBank  | Hox1  |
| Hox2      | Hox2         | ACJ74381.1 | GenBank  | Hox2  |
| Hox3      | Hox3         | ACJ74380.1 | GenBank  | Hox3  |
| Hox4      | Hox4         | ACJ74383.1 | GenBank  | Hox4  |
| Hox5      | Hox5         | ACJ74385.1 | GenBank  | Hox5  |
| Hox6      | Hox6         | ACJ74384.1 | GenBank  | Hox6  |
| Hox7      | Hox7         | ACJ74388.1 | GenBank  | Hox7  |
| Hox8      | Hox8         | ACJ74387.1 | GenBank  | Hox8  |
| Hox9      | Hox9         | ACJ74386.1 | GenBank  | Hox9  |
| Hox10     | Hox10        | ACJ74389.1 | GenBank  | Hox10 |
| Hox11     | *            | AAF81909.1 | GenBank  | Hox11 |
| Hox12     | Hox12        | ACJ74391.1 | GenBank  | Hox12 |
| Hox13     | Hox13        | ACJ74390.1 | GenBank  | Hox13 |
| Hox14     | Hox14        | ACJ74393.1 | GenBank  | Hox14 |
| Hox15     | Hox15        | ACJ74394.1 | GenBank  | Hox15 |

**Table 2** An overview of the sequence data in the PSG gene cluster.

| Full Name                                                     | Abbreviation | Accession      | Database                | URL   |
|---------------------------------------------------------------|--------------|----------------|-------------------------|-------|
| Ppregnancy-specific beta-1-glycoprotein 1 isoform 2 precursor | PSG1         | NP_001171754.1 | NCBI Reference Sequence | PSG1  |
| pregnancy-specific beta-1-glycoprotein 2 precursor            | PSG2         | NP_112536.2    | NCBI Reference Sequence | PSG2  |
| pregnancy-specific beta-1-glycoprotein 3 precursor            | PSG3         | NP_066296.2    | NCBI Reference Sequence | PSG3  |
| pregnancy-specific beta-1-glycoprotein 4 isoform 1 precursor  | PSG4         | NP_002771.2    | NCBI Reference Sequence | PSG4  |
| pregnancy-specific beta-1-glycoprotein 5 precursor            | PSG5         | NP_002772.3    | NCBI Reference Sequence | PSG5  |
| pregnancy-specific beta-1-glycoprotein 6 isoform a precursor  | PSG6         | NP_002773.1    | NCBI Reference Sequence | PSG6  |
| Putative pregnancy-specific beta-1-glycoprotein 7             | PSG7         | Q13046.2       | UniProtKB/Swiss-Prot    | PSG7  |
| pregnancy-specific beta-1-glycoprotein 8 isoform a precursor  | PSG8         | NP_874366.1    | NCBI Reference Sequence | PSG8  |
| pregnancy-specific beta-1-glycoprotein 9 isoform 1 precursor  | PSG9         | NP_002775.3    | NCBI Reference Sequence | PSG9  |
| pregnancy-specific beta-1-glycoprotein 11 isoform 1 precursor | PSG11        | NP_002776.3    | NCBI Reference Sequence | PSG11 |

**Table 3** An overview of the sequence data in the  $\alpha$ -RhoX gene cluster.

| Full Name                          | Abbreviation | Accession      | Database                | URL    |
|------------------------------------|--------------|----------------|-------------------------|--------|
| reproductive homeobox 2A isoform 1 | rHOX2A       | NP_083479.1    | NCBI Reference Sequence | rHOX2A |
| reproductive homeobox 2B           | rHOX2B       | NP_001092786.1 | NCBI Reference Sequence | rHOX2B |
| reproductive homeobox 2C           | rHOX2C       | NP_001092788.1 | NCBI Reference Sequence | rHOX2C |
| reproductive homeobox 2D           | rHOX2D       | NP_001075138.2 | NCBI Reference Sequence | rHOX2D |
| reproductive homeobox 2E           | rHOX2E       | NP_001078817.1 | NCBI Reference Sequence | rHOX2E |
| reproductive homeobox 2F           | rHOX2F       | NP_001078825.1 | NCBI Reference Sequence | rHOX2F |
| reproductive homeobox 2G           | rHOX2G       | NP_001107625.1 | NCBI Reference Sequence | rHOX2G |
| reproductive homeobox 2H           | rHOX2H       | NP_001093935.1 | NCBI Reference Sequence | rHOX2H |
| reproductive homeobox 3A           | rHOX3A       | NP_918952.2    | NCBI Reference Sequence | rHOX3A |
| reproductive homeobox 3C           | rHOX3C       | NP_001095927.3 | NCBI Reference Sequence | rHOX3C |
| reproductive homeobox 3E           | rHOX3E       | NP_001171898.1 | NCBI Reference Sequence | rHOX3E |
| reproductive homeobox 3F           | rHOX3F       | NP_001035178.3 | NCBI Reference Sequence | rHOX3F |
| reproductive homeobox 3G           | rHOX3G       | NP_001138878.1 | NCBI Reference Sequence | rHOX3G |
| reproductive homeobox 3H           | rHOX3H       | NP_001107629.1 | NCBI Reference Sequence | rHOX3H |
| reproductive homeobox 4A           | rHOX4A       | NP_001034777.1 | NCBI Reference Sequence | rHOX4A |
| reproductive homeobox 4B           | rHOX4B       | NP_067275.1    | NCBI Reference Sequence | rHOX4B |
| reproductive homeobox 4C           | rHOX4C       | NP_001034778.1 | NCBI Reference Sequence | rHOX4C |
| reproductive homeobox 4D           | rHOX4D       | NP_001034784.1 | NCBI Reference Sequence | rHOX4D |
| reproductive homeobox 4E           | rHOX4E       | NP_957688.2    | NCBI Reference Sequence | rHOX4E |
| reproductive homeobox 4F           | rHOX4F       | NP_001034785.1 | NCBI Reference Sequence | rHOX4F |
| reproductive homeobox 4G           | rHOX4G       | NP_001034787.1 | NCBI Reference Sequence | rHOX4G |

**Table 4** An overview of the sequence data in the ADH gene cluster.

| Full Name                          | Abbreviation | Accession      | Database                | URL   |
|------------------------------------|--------------|----------------|-------------------------|-------|
| alcohol dehydrogenase 7            | ADH7         | AAB38424.1     | GenBank                 | ADH7  |
| alcohol dehydrogenase 1C           | ADH1C        | NP_000660.1    | NCBI Reference Sequence | ADH1C |
| alcohol dehydrogenase 1B isoform 1 | ADH1B        | NP_000659.2    | NCBI Reference Sequence | ADH1B |
| alcohol dehydrogenase 1A           | ADH1A        | NP_000658.1    | NCBI Reference Sequence | ADH1A |
| alcohol dehydrogenase 6 isoform 1  | ADH6         | NP_001095940.1 | NCBI Reference Sequence | ADH6  |
| alcohol dehydrogenase 4 isoform 1  | ADH4         | NP_001293101.1 | NCBI Reference Sequence | ADH4  |
| ADH5                               | ADH5         | CAG38730.1     | GenBank                 | ADH5  |
